# Supplementary material for: Pathogen surveillance in the informal settlement, Kibera, Kenya, using a metagenomics approach
Source: PLoS One. 2019 Oct 10;14(10):e0222531. doi: 10.1371/journal.pone.0222531 (PMC6786639; doi:10.1371/journal.pone.0222531)
Supplement: S12 Table — (XLSX) [file pone.0222531.s018.xlsx]

## Sheet: Table S12. Epi. PBIDS data
		Illness reported at the household level during the better recall period
		Epi week	Start date	Cluster 9		Cluster 10		All Cluster
				Diarrhea	Subjective fever	Diarrhea	Subjective fever	Diarrhea	Subjective fever
		Week 25	18th Jun	3	5	4	3	29	49
		Week 26	25th Jun	4	0	3	4	28	57
		Week 27	2nd Jul	1	0	4	7	28	59
		Week 28	9th Jul	0	1	6	5	37	65
		Week 29	16th Jul	1	1	5	3	34	74
		Week 30	23rd Jul	0	1	2	3	11	43
		Week 31	30th Jul	0	3	2	3	18	72
		Week 32	6th Aug	4	4	3	5	27	58
		Week 33	13th Aug	2	1	8	4	33	61
		Week 34	20th Aug	0	0	2	2	17	47
		Week 35
		In total		15	16	39	39	262	585
		Clinic visits
		Epi week	Start date	Cluster 9			Cluster 10			All Cluster
				Diarrhea	Acute Febrile Illness	All-cause clinic visits	Diarrhea	Acute Febrile Illness	All-cause clinic visits	Diarrhea	Acute Febrile Illness	All-cause clinic visits
		24	16th Jun	0	0	3	1	0	15	7	10	145
		25	18th Jun	1	1	16	0	1	32	26	24	456
		26	25th Jun	2	2	14	3	2	33	19	33	509
		27	2nd Jul	0	2	26	2	3	32	13	30	451
		28	9th Jul	1	1	13	1	1	52	14	22	485
		29	16th Jul	1	1	22	0	2	37	19	28	465
		30	23rd Jul	0	2	16	2	4	31	15	26	395
		31	30th Jul	0	0	24	2	1	31	11	37	493
		32	6th Aug	1	3	22	2	1	24	13	28	441
		33	13th Aug	1	0	10	1	2	36	16	27	438
		34	20th Aug	0	2	19	1	1	20	10	21	286
		35
		Total		7	14	185	15	18	343	163	286	4564
		Cluster 9	Bacterial strains isolated during the study period.
		Epi week	Start date	Campy_ coli	Campy_ jejuni	Salmonella GroupB	Salmonella GroupC2	Salmonella Species	Styphi	Shigella_Sonnei	Shigella_ boydii	Shigella dysenteriaeA1	Shigella flexneri	Shigella species	Normal flora (E. coli
		25	2017-06-15	0	0	0	0	0	0	0	0	0	0	0	0
		26	2017-06-22	0	0	0	0	0	0	0	0	0	0	0	2
		27	2017-06-29	0	0	0	0	0	0	0	0	0	0	0	0
		28	2017-07-06	0	0	0	0	0	0	0	0	0	0	0	0
		29	2017-07-13	0	0	0	0	0	0	0	0	0	0	0	0
		30	2017-07-20	0	0	0	0	0	0	0	0	0	0	0	0
		31	2017-07-27	0	0	0	0	0	0	0	0	0	0	0	0
		32	2017-08-03	0	0	0	0	0	0	0	0	0	0	0	0
		33	2017-08-10	0	0	0	0	0	0	0	0	0	0	0	1
		34	2017-08-17	0	0	0	0	0	0	0	0	0	0	0	0
		35	2017-08-24	0	0	0	0	0	0	0	0	0	0	0	0
		In total		0	0	0	0	0	0	0	0	0	0	0	3
		Cluster 10	Bacterial strains isolated during the study period.
		Epi week	Start date	Campy_ coli	Campy_ jejuni	Salmonella GroupB	Salmonella GroupC2	Salmonella Species	Styphi	Shigella_ Sonnei	Shigella_ boydii	Shigell dysenteriaeA1	Shigella flexneri	Shigella species	Normal flora (E. coli
		25	2017-06-15	0	0	0	0	0	0	0	0	0	0	0	0
		26	2017-06-22	0	0	0	0	0	0	0	0	0	0	0	1
		27	2017-06-29	0	0	0	0	0	0	0	0	0	0	0	2
		28	2017-07-06	0	0	0	0	0	0	0	0	0	0	0	1
		29	2017-07-13	0	0	0	0	0	0	0	0	0	0	0	0
		30	2017-07-20	0	0	0	0	0	0	0	0	0	0	0	0
		31	2017-07-27	0	0	0	0	0	0	0	0	0	0	0	1
		32	2017-08-03	0	0	0	0	0	0	0	0	0	0	0	1
		33	2017-08-10	0	0	0	0	0	0	0	0	0	0	0	1
		34	2017-08-17	0	0	0	0	0	0	0	0	0	1	0	0
		35	2017-08-24	0	0	0	0	0	0	0	0	0	0	0	0
		In total		0	0	0	0	0	0	0	0	0	1	0	7
